# Impact of spatial scale and edge weight on predictive power of cortical thickness networks

Pradeep Reddy Raamana<sup>1</sup>, Stephen C. Strother<sup>2,3</sup>,  
and for The Alzheimer's Disease Neuroimaging Initiative

<sup>1</sup>Rotman Research Institute, Baycrest Health Sciences, Toronto, ON, Canada.

<sup>2</sup>Department of Medical Biophysics, University of Toronto, Toronto, ON, Canada.

## Abstract

Network-level analysis based on anatomical covariance (cortical thickness) has been gaining increasing popularity recently. However, there has not been a systematic study of the impact of spatial scale and edge definitions on predictive performance. In order to obtain a clear understanding of relative performance, there is a need for systematic comparison. In this study, we present a histogram-based approach to construct subject-wise weighted networks that enable a principled comparison across different methods of network analysis. We design several weighted networks based on two large publicly available datasets and perform a robust evaluation of their predictive power under three levels of separability. One of the interesting insights include the robust predictive power resulting from lack of significant impact of changes in nodal size (spatial scale) among the three classification experiments. We also release an open source python package to enable others to implement presented network feature extraction algorithm in their research.

**Index Terms:** cortical thickness, graph theory, early detection, mild cognitive impairment, alzheimer, model comparison, histogram distance, magnetic resonance imaging

---

<sup>1</sup> Corresponding author email: [praamana@research.baycrest.org](mailto:praamana@research.baycrest.org)

# Introduction

Alzheimer's disease (AD) is a deadly brain disorder that is expected to result in health-care burden of over \$250 billion in 2017 alone (Alzheimer's Association 2017). Although there has been great progress in the last few decades in accurately characterizing AD as well as its progression (Weiner et al. 2017, 2013, 2015), its translation to improvement of clinical trials continues to be a great challenge (Cummings, Morstorf, and Zhong 2014). For any preventive or disease-modifying therapies to succeed, early detection is key.

Regional and network-level analyses of features derived from multiple modalities such as structural magnetic resonance imaging (sMRI) (Cuingnet et al. 2011; Bron et al. 2015), positron emission tomography (PET) (Dukart et al. 2011; Herholz et al. 2002; Kustra and Strother 2001) and resting-state functional MRI (rs-fMRI) (Hojjati, Ebrahimzadeh, and Khazaei 2017; Abraham et al. 2017) are showing great promise in identifying differences between health and disease in the early stages, as well in establishing how they correlate with cognitive measures (Alexander-Bloch, Giedd, and Bullmore 2013; Tijms et al. 2013). Multimodal predictive modeling methods typically demonstrate high prognostic accuracy (Sui et al. 2011; Arbabshirani et al. 2017) in many applications, owing to their training based on multiple sets of rich and complementary information related to disease. However, recent efforts in building more sophisticated machine learning strategies produced unimodal sMRI methods rivaling the state-of-the-art multimodal approaches (Weiner et al. 2017). Although multi-modal approaches tend to be more sensitive in general and offer richer insight, the practical advantages of sMRI being non-invasive, cost-effective and widely-accessible in the clinic, make sMRI-based computer-aided diagnostic methods for early detection more preferable.

Cortical thickness is a sensitive imaging biomarker that can be easily derived from sMRI to diagnose AD. However, its sensitivity to identify the prodromal subjects (such as mild cognitive impairment(MCI)) at risk of progressing to AD is limited (Cuingnet et al. 2011). Network-level analysis of cortical thickness and gray matter features, demonstrating its potential to provide novel insights or improve predictive power (Raamana et al. 2015) is gaining in popularity (Evans 2013; Wen, He, and Sachdev 2011). Thickness covariance features offer complementary information compared to the underlying fiber density (Gong et al. 2012) and are shown to have potential for early detection of AD (Raamana et al. 2015; Wee et al. 2012; Dai et al. 2012; Kim et al. 2016), as well as for subtype discrimination (Raamana, Wen, et al. 2014).

Network analysis studies in cortical thickness range from

1. group-wise studies building networks based on group-wise correlation in cortical thickness (Evans 2013; He and Chen 2007), which characterized the properties of these networks (such as small-worldness) as well as provided useful insight into network-level changes between two diagnostic groups e.g. healthy controls (CN) and Alzheimer's disease (AD),
2. studies building individual subject-wise graphs (Raamana et al. 2015; Tijms et al. 2012; Wee et al. 2012; Dai et al. 2012; Kim et al. 2016) to enable predictive modeling. These studies resulted in disease-related insights into network-level imaging biomarkers and improved accuracy for the early detection of AD. However, these studies are based on distinctly different parcellation schemes of the cortex, vastly different ways of linking two different regions in the brain, and datasets differing in size and demographics.

Insights derived from various brain network studies showed considerable variability in reported group differences (Tijms et al. 2013), and a widely accepted method for network construction is yet to be adopted (Stam 2014). There have been recent efforts into understanding the importance and impact of graph creation methods, sample sizes and density (van Wijk, Stam, and Daffertshofer 2010; Phillips et al. 2015). However these studies has been restricted to

the choice of correlation methods across subjects to define the edges, or limited to understanding the group-wise differences in selected graph measures, but not in individual-subject predictive modelling. Hence, there is no clear understanding of the impact of different choices in the network construction and their relative predictive performance.

Given their high potential (Raamana et al. 2015; Raamana, Wen, et al. 2014) for the development of accurate early detection methods and its wide-accessibility, thickness-based networks deserve a systematic study in terms of

1. how does the choice of edge weight or linking criterion (correlation (He and Chen 2007), similarity (Raamana et al. 2015) affect the performance of the predictive models? See Table HDTABLE for more details.
2. how does the scale of parcellation (size and number of cortical ROIs) affect the predictive performance?

These questions analyzed in a systematic study can reveal important tradeoffs of this newly emerging theme of research. In this study, we present a comparison of six different ways of constructing thickness-based networks and present classification results

- under three different levels of separabilities i.e. in discriminating AD from CN, mild cognitive impairment (MCI) from CN, and Autism (AUT) subjects from CN.
- based on two large publicly available datasets, not only to replicate the results on an independent dataset, but also in the presence of a different disease and in a different age group.

## Methods

### ADNI dataset

Data used in the preparation of this article were obtained from the Alzheimer’s Disease Neuroimaging Initiative (ADNI) database ([adni.loni.usc.edu](http://adni.loni.usc.edu)). The ADNI was launched in 2003 as a public-private partnership, led by Principal Investigator Michael W. Weiner, MD. The primary goal of ADNI has been to test whether serial magnetic resonance imaging (MRI), positron emission tomography (PET), other biological markers, and clinical and neuropsychological assessment can be combined to measure the progression of mild cognitive impairment (MCI) and early Alzheimer’s disease (AD). For up-to-date information, see [www.adni-info.org](http://www.adni-info.org).

We downloaded all available baseline T1 MRI scans from the ADNI dataset (Jack et al. 2008), which have quality-controlled Freesurfer parcellation (version 4.3) of the cortical surfaces provided in the ADNI portal (B. Fischl and Dale 2000; Bruce Fischl et al. 2002). The parcellation and cortical thickness values downloaded were visually inspected for errors in geometry and range, which eliminated 24 subjects. The thickness features from the remaining subjects for the CN and AD groups (effective  $n=412$ ) comprised the first set of subjects for our analysis in this study. The second set of subjects with a slightly lower level of separability (MCI subjects converting to AD in 18 months, denoted by MCIc) are chosen to match the benchmarking study (Cuingnet et al. 2011) as much as possible (to enable comparison to many methods included) whenever the data availability and quality control allowed for it. The demographics for the two sets are listed in Table 1.

TABLE 1: *ADNI I Demographics*

| Diagnostic Group                         | N   | Females | Age          | MMSE*        |
|------------------------------------------|-----|---------|--------------|--------------|
| Dataset 1: ADNI                          |     |         |              |              |
| Healthy controls (CN1)                   | 224 | 109     | 75.79 (4.99) | 29.11 (1.01) |
| Alzheimer's disease (AD)                 | 188 | 89      | 75.22 (7.49) | 23.29 (2.04) |
| Dataset 2: ADNI                          |     |         |              |              |
| Controls for MCI (CN2)^                  | 159 | 85      | 76.07 (5.33) | 29.17 (0.98) |
| MCI converters to AD in 18 months (MCIc) | 76  | 33      | 74.67 (7.35) | 26.47 (1.86) |

All statistics here are displayed in mean (SD) format.

\*ADNI: Only MMSE is significantly different between CN & AD with  $p < 0.05$ .

^ADNI: Controls and MCI converters are chosen to match the benchmark samples presented in (Cuingnet et al. 2011) as best as possible allowing for exclusions due to quality control.

## ABIDE dataset

In order to study whether the conclusions drawn from the ADNI dataset generalize to a different dataset and a different disease cohort, we have obtained the Freesurfer parcellations from the the [Autism Brain Imaging Data Exchange \(ABIDE\)](#) preprocessed dataset made available freely on the [ABIDE website](#) (Craddock, Cameron and Benhajali, Yassine and Chu, Carlton and Chouinard, Francois and Evans, Alan and Jakab, Andr?s and Khundrakpam, Budhachandra Singh and Lewis, John David and Li, Qingyang and Milham, Michael and Yan, Chaogan and Bellec, Pierre 2013). The cortical parcellations have been visually inspected for errors in geometry estimation and value ranges to eliminate any subjects showing even a mild chance of failure. From the passing subjects, we randomly selected 200 subjects whose demographics are presented in Table 2.

Table 2: *ABIDE I demographics*

| Dataset 3: ABIDE       |     |         |              |                |                |                |
|------------------------|-----|---------|--------------|----------------|----------------|----------------|
| Diagnostic Group       | N   | Females | Age          | FIQ*           | PIQ            | VIQ*           |
| Healthy controls (CN3) | 100 | 17      | 17.27 (7.68) | 109.10 (12.35) | 105.64 (12.74) | 111.89 (13.52) |
| Autism (AUT)           | 100 | 9       | 15.82 (5.93) | 103.49 (14.68) | 104.57 (14.68) | 101.36 (15.86) |

ABIDE: FIQ and VIQ are significantly different between CN & AUT with  $p < 0.05$ .  
[FIQ: Full IQ standard score](#)  
[VIQ: Verbal IQ standard score](#)  
[PIQ: Performance IQ standard score](#)

## Feature extraction

In the following sections, we describe the steps involved in the extraction of weighted networks based on T1 MRI scans of the different subjects in the two independent datasets.

## Alignment and dimensionality reduction

Cortical thickness features studied here were obtained from the Freesurfer parcellations. They were then resampled to the *fsaverage* atlas and smoothed at *fwhm*=10mm. This is achieved by Freesurfer `-qcach` processing option, which registers each of the subjects to the *fsaverage* atlas (provided with Freesurfer) to establish vertex-wise correspondence across all the subjects.

## Cortical subdivision

In order to avoid the curse of dimensionality and to reduce the computational burden, the atlas has been subdivided using a patch-wise parcellation technique originally presented in (Raamana et al. 2015). Here, we use an adaptive version wherein the patch-size is controlled by number of vertices (denoted by  $m$ =vertices/patch), instead of choosing a globally fixed number of patches (say 10) per Freesurfer label regardless of its size (which can vary widely resulting in vastly different patch sizes within the same subject). As we change  $m$ , the subdivision of the cortical labels is performed purely on the existing mesh, and neither the geometrical parcellation itself nor the vertex density are modified. Here,  $m$  can be taken as the size of the graph node (imagine the node as a small patch within different Freesurfer labels). Alternatively,  $m$  can be seen as the spatial scale of the graph analysis, whose impact is being assessed for different values of  $m = 1000, 2000, 3000, 5000$  and  $10000$ . These values of  $m$  resulted in the following total number of patches in the whole cortex: 273, 136, 97, 74 and 68 respectively.

Table 3

| Type of base representation    | Type of edge weight metric       | Acronym | Mathematical definition                                         |
|--------------------------------|----------------------------------|---------|-----------------------------------------------------------------|
| Summarized (median in a patch) | Similarity (Raamana et al. 2015) | MD      | $ M_i - M_j $                                                   |
|                                | exp(similarity)                  | EMD     | $e^{-\frac{(\mu_i - \mu_j)^2}{2(\sigma_i + \sigma_j)}}$         |
| Raw distribution               | Wilcoxon ranksum statistic       | RS      | Ranksum test statistic                                          |
| Normalized histogram           | Histogram correlation            | HCOR    | $\rho(h_i, h_j)$                                                |
|                                | $\chi^2$ statistic               | CHI2    | $2 \sum_{k=1}^N \frac{(h_i(k) - h_j(k))^2}{h_i(k) + h_j(k)}$    |
|                                | Histogram intersection           | HINT    | $\frac{\sum_{k=1}^N \min(h_i(k), h_j(k))}{\sum_{k=1}^N h_i(k)}$ |

For patches  $i$  and  $j$ ,  $M$  is the median of a patch-wise distribution of vertex-wise thickness values,  $h$  is the normalized histogram of a given distribution.  $N$  is the number of bins in histogram, which is fixed at  $N=100$  bins. Here,  $\rho$  is the Pearson correlation coefficient between two vectors of equal length.

## Covariance computation

Covariance computation in its early form was mostly based on group-wise correlations (He and

Chen 2007). Our previous publications based on cortical thickness (Raamana et al. 2015; Raamana, Wen, et al. 2014) and other interesting studies on gray matter density and the like (Tijms et al. 2012; Wee et al. 2012) extend the earlier approaches to individualized subject-wise network extraction methods. Many of these previous studies relied on summarizing the thickness distribution in a given ROI (mean within the entire Freesurfer label as in (Tijms et al. 2012)) or within a patch (Freesurfer label subdivided further as in (Raamana et al. 2015)), before constructing the networks. Although such approaches reduce the dimensionality and provide us with smooth features, they do not utilize the rich description and variance of the distribution of features. Moreover, studies thus far computed characteristic features from a binary network (by applying an optimized threshold (Raamana et al. 2015)) or using a vector representation of weighted graphs (vector of distances in the upper triangular part of the edge weight matrix, as they are symmetric (Tijms et al. 2012)). Here, in order to enable a principled comparison across the different edge weights (and to avoid the optimization of an arbitrary threshold required to binarize the edge weight matrix), we study weighted-networks only, whose derivation is described below.

## Histogram WEighted NETworks (HiWeNet)

In this section, we describe the method employed in constructing the Histogram WEighted NETworks (HiWeNet) based on cortical thickness. First, to improve the robustness of the features, 5% outliers from both tails of the distribution of cortical thickness values are discarded from each patch at a given scale  $m$  (see Appendix for more information). The residual distribution is converted into a histogram by binning into uniformly spaced  $n = 100$  bins. Then the histogram counts are normalized using

$$h_i(k) = \frac{h_i(k)}{\sum_{k=1}^N h_i(k)}$$

for  $k = 1 : N$ , where  $h_i$  is the histogram of patch  $i$ . This method (illustrated further in Figure 1) enables the computation of the pairwise edge-weight (distance between the histograms, denoted by EW) for the two patches  $i$  and  $j$ . A variety of histogram distances as listed in Table 3 are studied in this paper to analyze their impact on predictive power.

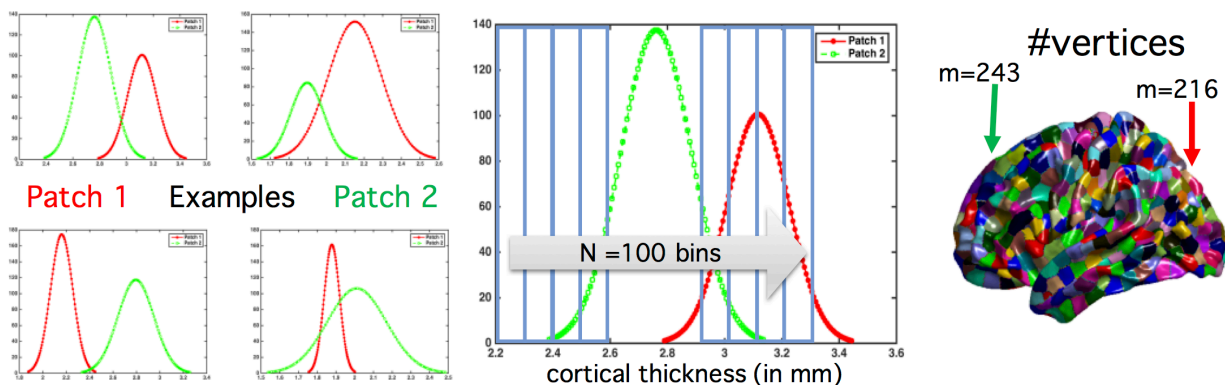

Fig. 1: Construction of histogram-distance weighted networks (HiWeNet) based on cortical thickness features using edge-weight calculations (applicable to HCOR, CHI2 and HINT metrics in Table 3). The four smaller subpanels on the left show typical distributions of cortical thickness values for four random pairs of patches (in green and red) in a given subject (shown on cortical visualization on right). They demonstrate the means and shape of these distributions can vary substantially as you traverse across different pairs of cortical patches. The large panel in the middle illustrates the type of binning used to construct the histogram from each patch.

To analyze the relative benefit of HiWeNet, we compare the histogram based methods to three commonly used inter-nodal weights based on descriptive summary statistics (denoted as MD, EMD and RS in Table 3). Once the edge weight matrix is computed (which is symmetric), we

extract the upper-triangular part of the matrix and vectorize it (of length  $n*(n-1)/2$ , where  $n$  is the number of patches on the cortex for a given number of vertices/patch  $m$ ). The vectorized array of edge weights (VEW) forms the input to the classifier. Each element of VEW corresponds to a unique edge in the matrix of pairwise edges.

## Open source software

Almost all of the computational code related to this study had been implemented in Matlab. In order to enable other researchers to utilize the presented feature extraction technique, we have re-implemented the core HiWeNet algorithm in Python and made it publicly available at this URL: <https://github.com/raamana/hiwenet> (Raamana 2017). Note this python package has not been used to produce the current results, but has been re-implemented by Raamana in Python to contribute to open source and also to make it accessible to broader audience who may not have access to expensive Matlab license.

## Group-wise differences

To illustrate the differences between the proposed methods of computing edge weights, we compute the distributions of vertex-wise mean thickness values for CN and AD separately. We then visualize them in the form of a matrix of pairwise edge weights at  $m=2000$ , as shown in Figures 2 (a) and 2(b). Each row (say node  $i$ ) in a given edge-weight matrix (from one group say CN in Fig. 2 (a)) here refers to the pairwise edge weights w.r.t remaining nodes  $j$ ,  $j = 1:N$ . As the differences are subtle and spatially distributed, for easy comparison between the two classes, we visualize the arithmetic differences between the two classes in Fig. 2 (c).

The visualizations in Figure 2(c) offer useful insight into the group-wise differences between CN and AD, and across different edge weight distances. However, visual differences do not imply differences in predictive power of features extracted these network of weights. Hence, it is important to assess their predictive utility in discriminating AD from CN.

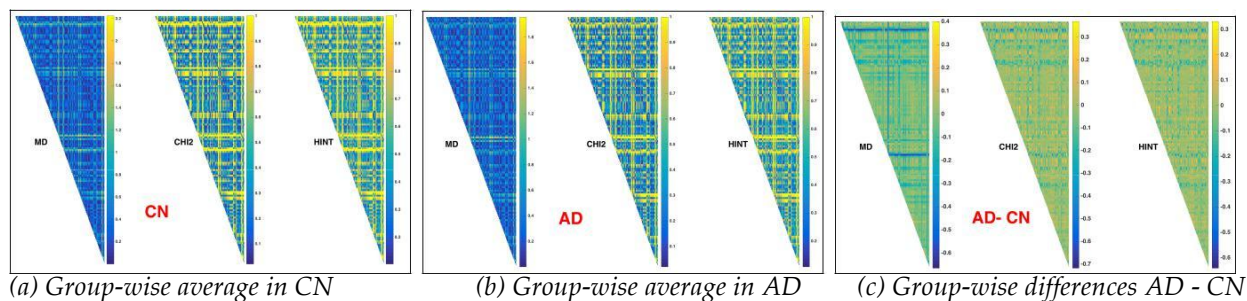

Fig. 2. Edge weights derived from group-wise average thicknesses for three definitions of edge weight. (a) healthy controls (CN) (b) Edge weights group-wise average in Alzheimer's disease (AD), both at  $m=2000$ . (c) Arithmetic differences i.e.  $AD - CN$ . The three panels in each subfigure show the edge weights from MD, CHI2 and HINT methods as defined in Table 3. In each of the panels, we present the upper triangular part of the edge-weight matrix (pairwise) computed using the corresponding equations in Table 3. We notice there are clear differences among the patterns in the three panels. The panels a and b appear similar at the first glance, but they are sufficiently different to be observed in Fig. 2(c).

## Comparison of predictive utility

In this section, we describe the procedure and techniques used to evaluate and compare the predictive power of multiple variations of the network-level features. Thanks to large sample sizes, we could employ a repeated nested split-half cross-validation (CV) scheme, with 50%

reserved for training, in order to maximize the sizes of training and test sets. Moreover, in each iteration of CV, all the methods are trained and assessed on the exact same training and test sets, in order to “pair” the performance estimates. This technique is shown to produce reliable and stable estimates of differences in predictive performance across different methods (Dietterich 1998; Burman 1989; Demšar 2006), instead of pooling multiple sets of performance distributions estimated separately on different training and test sets for each method independently. This setup allows us to compare large numbers of methods and their variants simultaneously.

## Cross-validation scheme

The comparison scheme employed is comprised of the following steps:

- 1) repeated split-half cross-validation scheme, with class-sizes stratified in the training set (RHsT) (Raamana et al. 2015), to minimize class-imbalance in the training set. This scheme is repeated  $N=200$  times, to obtain the  $N$  paired estimates of classification performance.
- 2) In each CV run,
  - a) feature selection (from VEW) on one split (training set of size  $N_{\text{train}}$ ) is performed based on t-statistic based ranking (based on group-wise differences in the training set only), selecting only the top  $N_{\text{train}}/10$  elements. The frequency of selection of a particular element (which is an edge in the cortical space) over different CV trials by the t-statistic ranking is an indication of its discriminative utility, and will be visualized to obtain better insight into the process.
  - b) Optimization of SVM in an inner split-half CV applied to the training set has been performed via grid search over the following ranges of values for the margin control parameter  $C = 10^7$ ;  $p = 3 : 5$  and the kernel bandwidth =  $2^7$ ;  $q = 5 : 4$ .
  - c) The optimized SVM is tested on the second split to evaluate its performance.
- 3) The process in Step 2 is repeated  $N=200$  times (Varoquaux et al. 2016; Raamana et al. 2015) to obtain 200 independent estimates for each method being compared.
- 4) In this study, we measure the performance by area under the predictive receiver operating characteristic (ROC) curve (denoted by AUC), whose distributions for different methods are shown in Figure 3.

## Results and Discussion

The RHsT cross-validation scheme is employed for each of the three classification experiments from two independent datasets i.e. CN1 vs. AD, CN2 vs. MCIc and CN3 vs. AUT. The performance distributions for the different combinations are shown in Fig. 3.



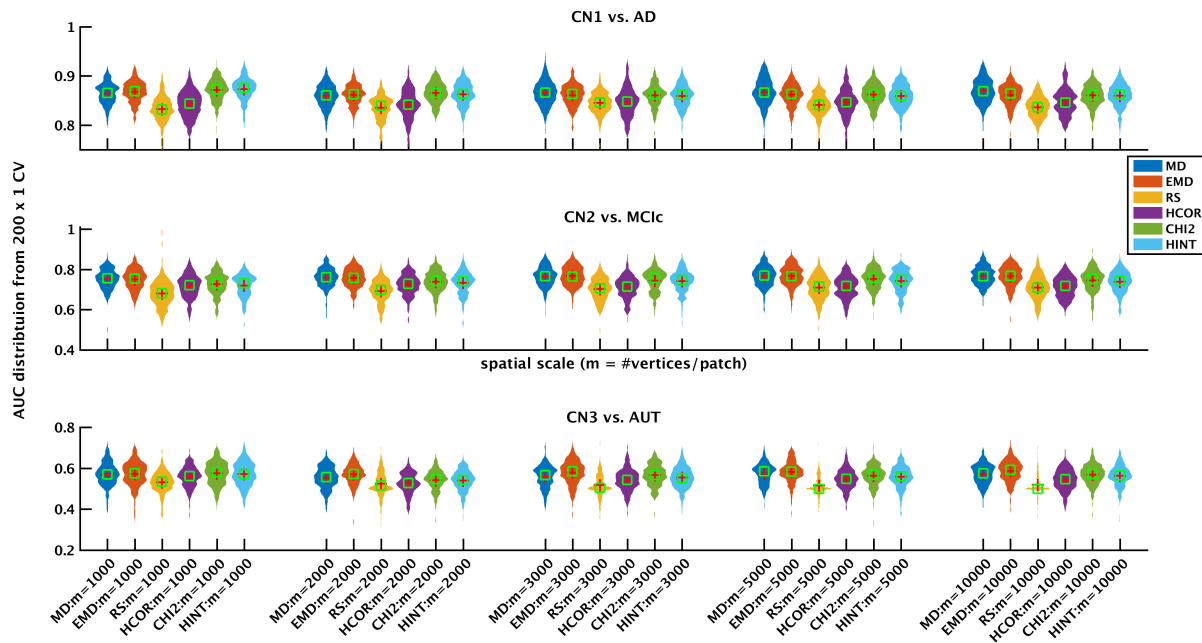

Fig. 3. Classification performance for the different network methods (different edge weight metrics at different spatial resolutions of  $m$ ) in discriminating AD (top panel), MCIc (middle panel) and AUT (bottom) panel from their respective control groups under a rigorous CV scheme. The performance presented here is a distribution of AUC values from 200 randomized train/test splits of RHsT (whose median is shown with a red cross-hair symbol).

Focusing on the top panel (CN1 vs. AD), there are numerical differences in performance among different methods at fixed scale ( $m$ ). However, the pattern remains similar across different spatial scales. The MD, EMD, CHI2 and HINT methods are consistently outperforming, numerically speaking, the RS and HCOR methods across different values of  $m$ . Broadly speaking, the patterns of change in AUC in Fig. 3 within each panel as we move from left to right (going over different combinations) is quite similar to the rest, although at a different median baseline (at AUC=0.87 for CN1 vs. AD, at AUC=0.75 for CN2 vs. MCIc and at AUC=0.6 for CN3 vs. AUT).

## Statistical significance testing

In order to assess the statistical significance of differences among large set of methods, we performed a nonparametric Friedman test (Dietterich 1998) comparing the performance of the 30 different classifiers (6 methods at 5 spatial scales) simultaneously, for each of the three experiments separately. The results from post-hoc Nemenyi test (Demšar 2006) are visualized in a convenient critical difference (CD) diagram (Kourentzes 2016) as shown in Figure 4.

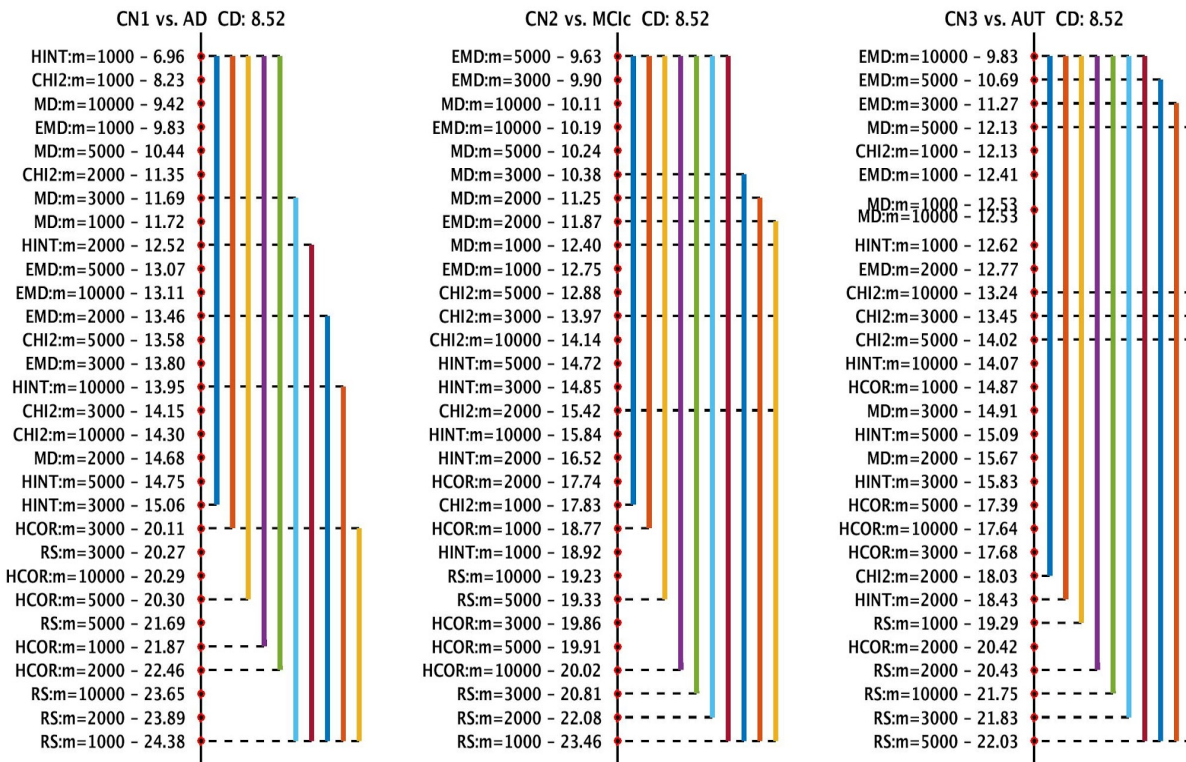

Fig. 4. Critical difference diagram comparing the ranks of different classification methods in a non-parametric Friedman test based on classification performance results from a rigorous CV evaluation method using 200 iterations of holdout. Here, smaller numerical values for rank implies higher performance. The vertical axis presents the ranks (better ranks and methods at the top, and worse ranks and methods to the bottom). The performance of any two methods are statistically significantly different from each other, if their ranks differ by at least the critical difference (CD), which is noted on top of each of the three panels. If the ranks of a group of methods (annotations on the left within each panel) are connected by a line, they are not statistically significantly different from each other. Different colored lines here present groups of methods that are not significantly different from each other in ranks. For example, in the leftmost panel presenting the results from CN1 vs. AD experiment, the leftmost blue line connects all the methods between the highest ranked (HINT:m=1000, ranked 6.96) to the HINT:m=3000 method (ranked 15.06), including themselves, which implies they are not statistically significantly different from each other. In the same panel, the highest-ranked HINT:m=1000 method is not connected to RS:m=1000 (least-ranked 24.38) via any of the colored lines - hence they are indeed statistically significantly different from each other (difference in ranks higher than CD).

The left panel in Fig. 4 shows that only the top 6 methods (with median ranks from 6.96 to 11.35) are statistically significantly different from the lowest-ranked methods, at  $\alpha=0.05$ , correcting for multiple comparisons. The remaining 30 methods, when compared together simultaneously, are not significantly different from each other. The top-ranked 6 methods are not statistically significantly different from each other. We observe a similar pattern in the center panel (CN2 vs. MCIc), except only the top 5 are statistically significantly different from the lowest ranked methods. In the CN3 vs. AUT case, there are no significant differences at all, possibly due to rather low performance from all the methods to begin with (median AUC across methods is around 0.55).

When the comparison is made at a fixed scale  $m$ , within each experiment, the performance of the 6 different methods (simultaneous comparison of 6 methods) for most values of  $m$  are not statistically significantly different from each other, except for  $m=1000$  (CD diagrams are not shown). When the comparison is done for a fixed edge-weight metric at different values of  $m$ ,

the performance is not statistically significantly different for any  $m$ . Also, the top 2 methods are MD networks at the highest resolution  $m = 1000$  and also at the lowest resolution  $m = 10,000$ . This indicates that impact of the nodal size on the predictive performance of a network method may be insignificant. This result is consistent with the findings of (Zalesky et al. 2010; Evans 2013), wherein it was observed that group-wise small-worldness and scale-freeness are unaffected by spatial scale.

## Most discriminative regions

As noted in our CV section earlier, our method records the frequency (across the  $N$  CV iterations) of selection (of each weighted connection in VEW) from the t-statistic based ranking method applied on the training set. This helps us gain insight into which pair-wise links have been most frequently discriminative. This pair-wise link frequency can be mapped back to individual cortical patches for intuitive visualization, identifying most discriminative regions (MDRs). One such visualization, thresholding the importance at 50% derived at  $m=2000$ , is shown in Fig 5. Each color on the cortex represents a particular EW metric (labelled on the colorbar) that led to its selection, and when multiple methods selected the same region (indicating additional importance), we painted it red and labelled it "Multiple". Note the input to the SVM classifier was a vector of edge weights (from upper-triangular part of the edge weight matrix), and hence the selection of a particular edge leads to highlighting both the regions forming the link. Moreover, the importance of a particular node (cortical patch) could be accumulated from its multiple links, if any.

Fig. 5 shows the red MDRs (identified by multiple methods as MDR) cover a large cortical area, which is not unexpected, given the changes caused by full AD are known to be widespread over the cortex. In Fig. 6, we observe the MDRs in areas consistently identified with progressive MCI or early stage AD such as middle temporal lobe, cingulate (anterior and inferior), cuneus and precuneus. Of interest here is the clear hemispheric asymmetry to the left, which can also be observed to a lesser extent in the MDRs for AD in Fig. 5. The MDRs identified in discriminating AUT from CN3 are shown in Fig. 7, and they appear in the lingual, supra-marginal, post- and precentral areas.

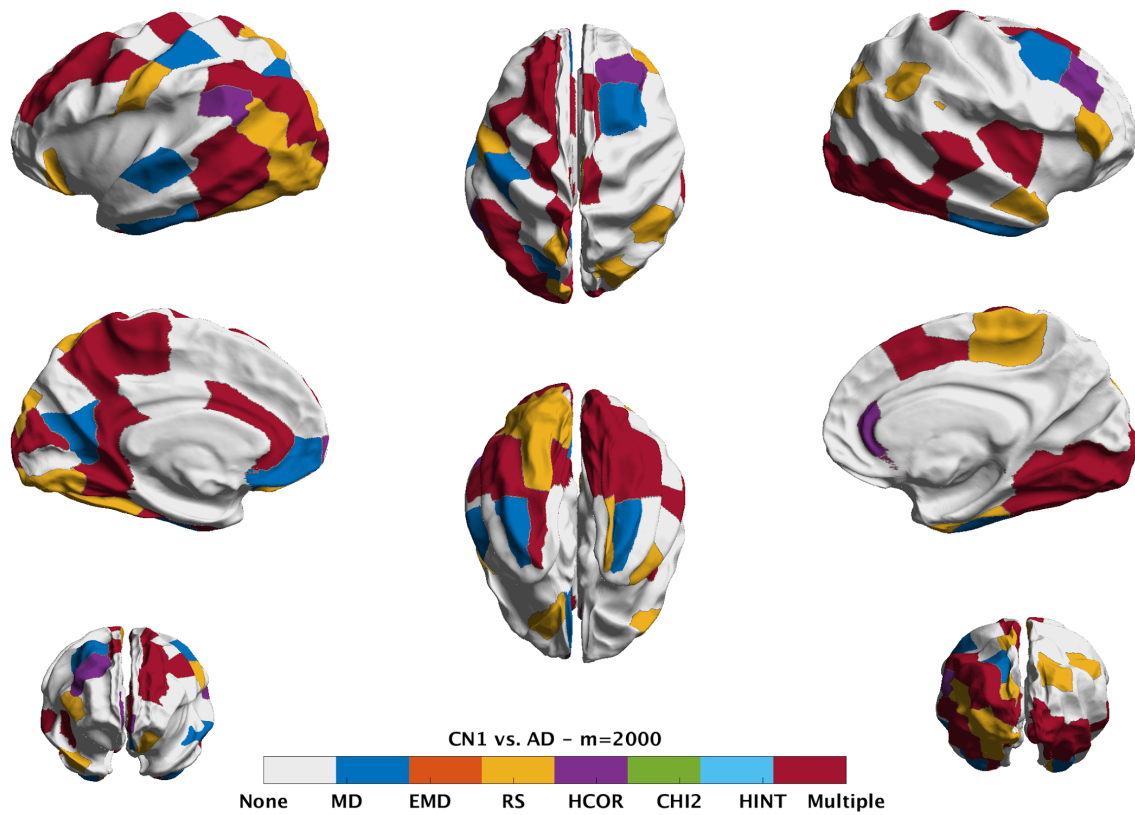

Fig 5: Visualization of the most discriminative regions as derived from the CN1 vs. AD experiment at  $m=2000$ . Due to distributed nature of the degeneration caused by AD, we expect the MDRs to span a wide area of the cortex as observed here.

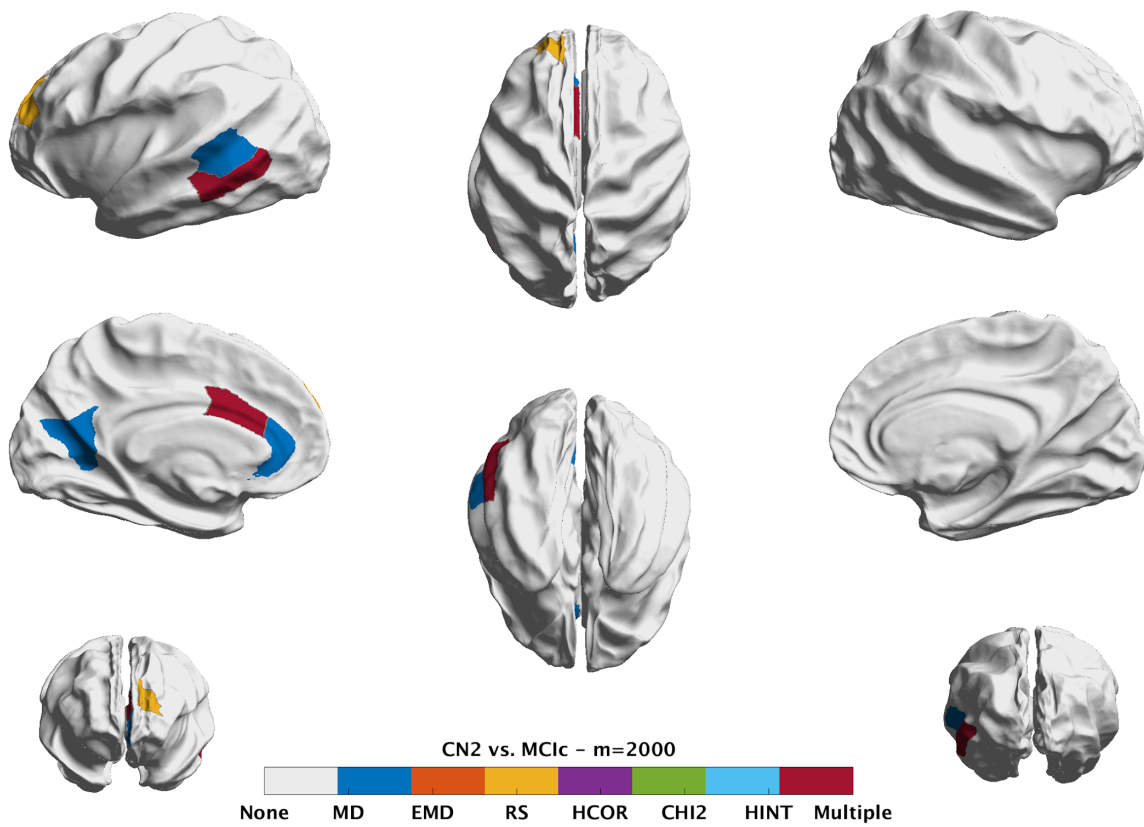

*Fig 6: Visualization of the most discriminative regions as derived from the CN2 vs. MC1c experiment at  $m=2000$ . MDRs in this experiment identify regions in middle temporal lobe, cingulate (anterior and inferior), cuneus and precuneus, which are known to be associated with progressive MCI and prodromal AD.*

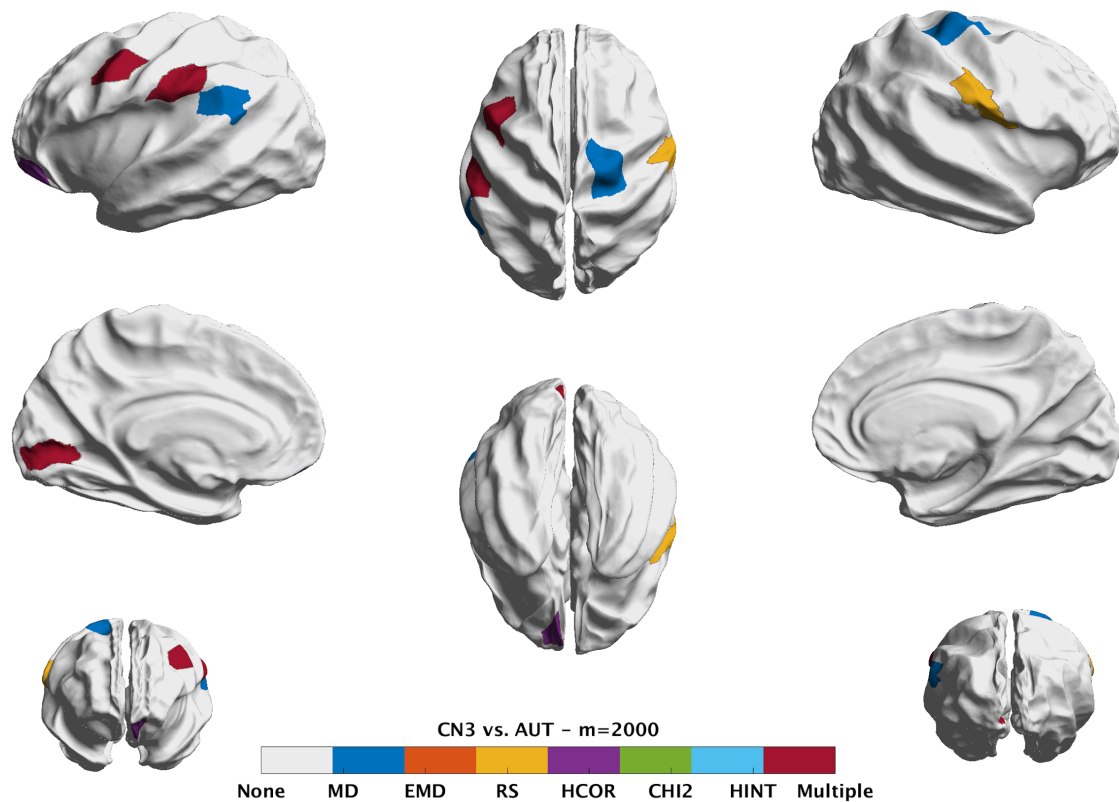

Fig 7: Visualization of the most discriminative regions as derived from the CN3 vs. AUT experiment at  $m=2000$ . These regions cover the lingual, supra-marginal, post- and precentral areas.

## Future directions

While we present the results from a large number (108) of experiments covering two large publicly available datasets, two disease and age groups and three different levels of separability, there is certainly room for further analysis such as including additional histogram distances, performing the comparison with a different type of classifier (other than SVM such as linear discriminant or random forests), and including additional replication datasets (such as AIBL). Such a broadening of scope for the study is not only computationally very intensive, but we believe studying the above is unlikely to change the conclusions. It would be nevertheless useful to quantitatively support it. It would also be interesting to study the impact of different atlas choices (other than *fsaverage*, such as MNI152), parcellation (such as (Destrieux et al. 2010)) and subdivision schemes (functional or geometric or multimodal), but this would be demanding not only computationally but also in expert manpower for quality control (typically unavailable). It would also be quite interesting to replicate this study in the context of differential diagnosis (Raamana, Rosen, et al. 2014).

## Conclusions

We have studied six different ways of constructing weighted networks based on cortical thickness features, based on a novel way to derive edge weights based on histograms. We performed a comprehensive model comparison based on nonparametric statistical tests and extensive cross-validation of their predictive utility. This study in under three separabilities (ranging from pronounced, mild and to subtle differences) derived from two independent and large publicly available datasets.

Some interesting results of this study based on the individual-subject classification results are:

- the simpler methods of edge weight computation such as the difference in median thickness are as predictive as the sophisticated methods relying on the richer descriptions based on complete histograms.
- within a given method, the impact of a spatial scale  $m$  on predictive performance is not significant. The most popular way of computing edge weights in group-wise analysis i.e. histogram correlation, is shown to be the least predictive of disease-status in the context of individualized prediction via HiWeNet.

## Acknowledgements

PRR is partly supported by CIHR (MOP 84483 to SCS) and with SCS the *Ontario Brain Institute*, an independent non-profit corporation, funded partially by the Ontario government. The opinions, results and conclusions are those of the authors and no endorsement by the Ontario Brain Institute is intended or should be inferred. We also thank the financial support from the *Temerty Family Foundation*.

## ADNI

Data collection and sharing for this project was funded by the Alzheimer's Disease Neuroimaging Initiative (ADNI) (National Institutes of Health Grant U01 AG024904) and DOD ADNI (Department of Defense award number W81XWH-12-2-0012). ADNI is funded by the National Institute on Aging, the National Institute of Biomedical Imaging and Bioengineering, and through generous contributions from the following: AbbVie, Alzheimer's Association; Alzheimer's Drug Discovery Foundation; Araclon Biotech; BioClinica, Inc.; Biogen; Bristol-Myers Squibb Company; CereSpir, Inc.; Cogstate; Eisai Inc.; Elan Pharmaceuticals, Inc.; Eli Lilly and Company; EuroImmun; F. Hoffmann-La Roche Ltd and its affiliated company Genentech, Inc.; Fujirebio; GE Healthcare; IXICO Ltd.; Janssen Alzheimer Immunotherapy Research & Development, LLC.; Johnson & Johnson Pharmaceutical Research & Development LLC.; Lumosity; Lundbeck; Merck & Co., Inc.; Meso Scale Diagnostics, LLC.; NeuroRx Research; Neurotrack Technologies; Novartis Pharmaceuticals Corporation; Pfizer Inc.; Piramal Imaging; Servier; Takeda Pharmaceutical Company; and Transition Therapeutics. The Canadian Institutes of Health Research is providing funds to support ADNI clinical sites in Canada. Private sector contributions are facilitated by the Foundation for the National Institutes of Health ([www.fnih.org](http://www.fnih.org)). The grantee organization is the Northern California Institute for Research and Education, and the study is coordinated by the Alzheimer's Therapeutic Research Institute at the University of Southern California. ADNI data are disseminated by the Laboratory for Neuro Imaging at the University of Southern California.

## ABIDE I

Primary support for the work by Adriana Di Martino was provided by the NIMH (K23MH087770) and the Leon Levy Foundation. Primary support for the work by Michael P. Milham and the INDI team was provided by gifts from Joseph P. Healy and the Stavros Niarchos Foundation to the Child Mind Institute, as well as by an NIMH award to MPM (R03MH096321).

## References

Abraham, Alexandre, Michael P. Milham, Adriana Di Martino, R. Cameron Craddock, Dimitris Samaras, Bertrand Thirion, and Gael Varoquaux. 2017. "Deriving Reproducible Biomarkers from Multi-Site Resting-State Data: An Autism-Based Example." *NeuroImage* 147

- (February): 736–45. doi:10.1016/j.neuroimage.2016.10.045.
- Alexander-Bloch, Aaron, Jay N. Giedd, and Ed Bullmore. 2013. "Imaging Structural Covariance between Human Brain Regions." *Nature Reviews. Neuroscience* 14 (5). Nature Publishing Group: 322–36. <http://www.nature.com/doi/10.1038/nrn3465>.
- Alzheimer's Association. 2017. "2017 Alzheimer's Disease Facts and Figures." *Alzheimer's & Dementia: The Journal of the Alzheimer's Association* 13 (4): 325–73. doi:10.1016/j.jalz.2017.02.001.
- Arbabshirani, Mohammad R., Sergey Plis, Jing Sui, and Vince D. Calhoun. 2017. "Single Subject Prediction of Brain Disorders in Neuroimaging: Promises and Pitfalls." *NeuroImage* 145 (Pt B). Elsevier: 137–65. <http://linkinghub.elsevier.com/retrieve/pii/S105381191600210X>.
- Bron, Esther E., Marion Smits, Wiesje M. van der Flier, Hugo Vrenken, Frederik Barkhof, Philip Scheltens, Janne M. Papma, et al. 2015. "Standardized Evaluation of Algorithms for Computer-Aided Diagnosis of Dementia Based on Structural MRI: The CADDementia Challenge." *NeuroImage* 111 (May): 562–79. doi:10.1016/j.neuroimage.2015.01.048.
- Burman, Prabir. 1989. "A Comparative Study of Ordinary Cross-Validation, v-Fold Cross-Validation and the Repeated Learning-Testing Methods." *Biometrika* 76 (3). Oxford University Press: 503–14. <http://biomet.oxfordjournals.org/cgi/doi/10.1093/biomet/76.3.503>.
- Craddock, Cameron and Benhajali, Yassine and Chu, Carlton and Chouinard, Francois and Evans, Alan and Jakab, Andr?s and Khundrakpam, Budhachandra Singh and Lewis, John David and Li, Qingyang and Milham, Michael and Yan, Chaogan and Bellec, Pierre. 2013. "The Neuro Bureau Preprocessing Initiative: Open Sharing of Preprocessed Neuroimaging Data and Derivatives]." *Frontiers in Neuroinformatics*. doi:10.3389/conf.fninf.2013.09.00041.
- Cuingnet, Rémi, Emilie Gerardin, Jérôme Tessieras, Guillaume Auzias, Stéphane Lehéricy, Marie-Odile Habert, Marie Chupin, Habib Benali, Olivier Colliot, and Alzheimer's Disease Neuroimaging Initiative. 2011. "Automatic Classification of Patients with Alzheimer's Disease from Structural MRI: A Comparison of Ten Methods Using the ADNI Database." *NeuroImage* 56 (2): 766–81. doi:10.1016/j.neuroimage.2010.06.013.
- Cummings, Jeffrey L., Travis Morstorf, and Kate Zhong. 2014. "Alzheimer's Disease Drug-Development Pipeline: Few Candidates, Frequent Failures." *Alzheimer's Research & Therapy* 6 (4): 37. doi:10.1186/alzrt269.
- Dai, Dai, Huiguang He, Joshua T. Vogelstein, and Zengguang Hou. 2012. "Accurate Prediction of AD Patients Using Cortical Thickness Networks." *International Journal of Computer Vision*, October. <http://www.springerlink.com/index/10.1007/s00138-012-0462-0>.
- Demšar, Janez. 2006. "Statistical Comparisons of Classifiers over Multiple Data Sets." *Journal of Machine Learning Research: JMLR* 7 (January). JMLR. org: 1–30. <http://dl.acm.org/citation.cfm?id=1248548>.
- Destrieux, Christophe, Bruce Fischl, Anders Dale, and Eric Halgren. 2010. "Automatic Parcellation of Human Cortical Gyri and Sulci Using Standard Anatomical Nomenclature." *NeuroImage* 53 (1): 1–15. doi:10.1016/j.neuroimage.2010.06.010.
- Dietterich, Thomas G. 1998. "Approximate Statistical Tests for Comparing Supervised Classification Learning Algorithms." *Neural Computation* 10 (7). MIT Press 238 Main St., Suite 500, Cambridge, MA 02142-1046 USA [journals-info@mit.edu](mailto:journals-info@mit.edu): 1895–1923. <http://www.mitpressjournals.org/doi/abs/10.1162/089976698300017197>.
- Dukart, Juergen, Karsten Mueller, Annette Horstmann, Henryk Barthel, Harald E. Möller, Arno Villringer, Osama Sabri, and Matthias L. Schroeter. 2011. "Combined Evaluation of FDG-PET and MRI Improves Detection and Differentiation of Dementia." *PloS One* 6 (3). Public Library of Science: e18111. <http://dx.plos.org/10.1371/journal.pone.0018111>.
- Evans, Alan C. 2013. "Networks of Anatomical Covariance." *NeuroImage* 80 (October). Elsevier: 489–504. <http://eutils.ncbi.nlm.nih.gov/entrez/eutils/elink.fcgi?dbfrom=pubmed&id=23711536&retmode=ref&cmd=prlinks>.
- Fischl, B., and A. Dale. 2000. "Measuring the Thickness of the Human Cerebral Cortex from Magnetic Resonance Images." *Proceedings of the National Academy of Sciences*, January. National Academy of Sciences. <http://www.pnas.org/cgi/content/abstract/97/20/11050>.



- Fischl, Bruce, David H. Salat, Evelina Busa, Marilyn Albert, Megan Dieterich, Christian Haselgrove, Andre van der Kouwe, et al. 2002. "Whole Brain Segmentation:: Automated Labeling of Neuroanatomical Structures in the Human Brain." *Neuron* 33 (3). Elsevier: 341–55. doi:10.1016/S0896-6273(02)00569-X.
- Gong, Gaolang, Yong He, Zhang J. Chen, and Alan C. Evans. 2012. "Convergence and Divergence of Thickness Correlations with Diffusion Connections across the Human Cerebral Cortex." *NeuroImage* 59 (2). Elsevier: 1239–48. <http://www.sciencedirect.com/science/article/pii/S1053811911009049>.
- Herholz, K., E. Salmon, D. Perani, J-C Baron, V. Holthoff, L. Frölich, P. Schönknecht, K. Ito, R. Mielke, and E. Kalbe. 2002. "Discrimination between Alzheimer Dementia and Controls by Automated Analysis of Multicenter FDG PET." *NeuroImage* 17 (1). Elsevier: 302–16. <http://linkinghub.elsevier.com/retrieve/pii/S1053811902912085>.
- He, Y., and Z. Chen. 2007. "Small-World Anatomical Networks in the Human Brain Revealed by Cortical Thickness from MRI." *Cerebral Cortex*, January. Oxford Univ Press. <http://cercor.oxfordjournals.org/content/17/10/2407.abstract>.
- Hojjati, S. H., A. Ebrahimzadeh, and A. Khazae. 2017. "Predicting Conversion from MCI to AD Using Resting-State fMRI, Graph Theoretical Approach and SVM." *Journal of Neuroscience*. Elsevier. <http://www.sciencedirect.com/science/article/pii/S0165027017300638>.
- Jack, Clifford R., Jr, Matt A. Bernstein, Nick C. Fox, Paul Thompson, Gene Alexander, Danielle Harvey, Bret Borowski, et al. 2008. "The Alzheimer's Disease Neuroimaging Initiative (ADNI): MRI Methods." *Journal of Magnetic Resonance Imaging: JMRI* 27 (4): 685–91. doi:10.1002/jmri.21049.
- Kim, Hee-Jong, Jeong-Hyeon Shin, Cheol E. Han, Hee Jin Kim, Duk L. Na, Sang Won Seo, Joon-Kyung Seong, and Alzheimer's Disease Neuroimaging Initiative. 2016. "Using Individualized Brain Network for Analyzing Structural Covariance of the Cerebral Cortex in Alzheimer's Patients." *Frontiers in Neuroscience* 10 (September). ncbi.nlm.nih.gov: 394. doi:10.3389/fnins.2016.00394.
- Kourentzes, Nikolaos. 2016. "ANOM and Nemenyi Tests." <http://kourentzes.com/forecasting/2013/04/19/nemenyi-test/>.
- Kustra, R., and S. Strother. 2001. "Penalized Discriminant Analysis of [<sup>15</sup>O]-Water PET Brain Images with Prediction Error Selection of Smoothness and Regularization Hyperparameters." *IEEE Transactions on Medical Imaging* 20 (5). ieeexplore.ieee.org: 376–87. doi:10.1109/42.925291.
- Phillips, David J., Alec McGlaughlin, David Ruth, Leah R. Jager, and Anja Soldan. 2015. "Graph Theoretic Analysis of Structural Connectivity across the Spectrum of Alzheimer's Disease: The Importance of Graph Creation Methods." *NeuroImage: Clinical* 7 (January). Elsevier: 377–90. <http://linkinghub.elsevier.com/retrieve/pii/S221315821500008X>.
- Raamana, Pradeep Reddy. 2017. *Histogram-Weighted Networks for Feature Extraction and Advance Analysis in Neuroscience* (version 0.1). doi:10.5281/zenodo.836100.
- Raamana, Pradeep Reddy, Howard Rosen, Bruce Miller, Michael W. Weiner, Lei Wang, and Mirza Faisal Beg. 2014. "Three-Class Differential Diagnosis among Alzheimer Disease, Frontotemporal Dementia and Controls." *Frontiers in Neurology* 5 (71). Frontiers Media SA: 71. doi:10.3389/fneur.2014.00071.
- Raamana, Pradeep Reddy, Michael W. Weiner, Lei Wang, and Mirza Faisal Beg. 2015. "Thickness Network Features for Prognostic Applications in Dementia." *Neurobiology of Aging* 36 (January). Elsevier Inc.: S91–102. <http://linkinghub.elsevier.com/retrieve/pii/S0197458014005521>.
- Raamana, Pradeep Reddy, Wei Wen, Nicole A. Kochan, Henry Brodaty, Perminder S. Sachdev, Lei Wang, and Mirza Faisal Beg. 2014. "Novel ThickNet Features for the Discrimination of Amnesic MCI Subtypes." *NeuroImage: Clinical* 6 (January). Elsevier: 284–95. <http://www.sciencedirect.com/science/article/pii/S2213158214001417>.
- Stam, Cornelis J. 2014. "Modern Network Science of Neurological Disorders." *Nature Reviews. Neuroscience* 15 (10). Nature Publishing Group: 683–95. <http://www.nature.com/doifinder/10.1038/nrn3801>.
- Sui, J., T. Adali, Q. Yu, and J. Chen. 2011. "A Review of Multivariate Methods for Multimodal

- Fusion of Brain Imaging Data." *Journal of Neuroscience Methods*, January.  
<http://www.sciencedirect.com/science/article/pii/S0165027011006820>.
- Tijms, Betty M., Peggy Seriès, David J. Willshaw, and Stephen M. Lawrie. 2012. "Similarity-Based Extraction of Individual Networks from Gray Matter MRI Scans." *Cerebral Cortex* 22 (7). Oxford Univ Press: 1530–41.  
<http://eutils.ncbi.nlm.nih.gov/entrez/eutils/elink.fcgi?dbfrom=pubmed&id=21878484&retmode=ref&cmd=prlinks>.
- Tijms, Betty M., Alle Meije Wink, Willem de Haan, Wiesje M. van der Flier, Cornelis J. Stam, Philip Scheltens, and Frederik Barkhof. 2013. "Alzheimer's Disease: Connecting Findings from Graph Theoretical Studies of Brain Networks." *Neurobiology of Aging* 34 (8). Elsevier Inc.: 2023–36.  
<http://eutils.ncbi.nlm.nih.gov/entrez/eutils/elink.fcgi?dbfrom=pubmed&id=23541878&retmode=ref&cmd=prlinks>.
- Varoquaux, Gaël, Pradeep Reddy Raamana, Denis A. Engemann, Andrés Hoyos-Idrobo, Yannick Schwartz, and Bertrand Thirion. 2016. "Assessing and Tuning Brain Decoders: Cross-Validation, Caveats, and Guidelines." *NeuroImage*, October. Elsevier.  
<http://linkinghub.elsevier.com/retrieve/pii/S105381191630595X>.
- Wee, Chong-Yaw, Pew-Thian Yap, Dinggang Shen, and for the Alzheimer's Disease Neuroimaging Initiative. 2012. "Prediction of Alzheimer's Disease and Mild Cognitive Impairment Using Cortical Morphological Patterns." *Human Brain Mapping*, August. NIH Public Access.  
<http://eutils.ncbi.nlm.nih.gov/entrez/eutils/elink.fcgi?dbfrom=pubmed&id=22927119&retmode=ref&cmd=prlinks>.
- Weiner, Michael W., Dallas P. Veitch, Paul S. Aisen, Laurel A. Beckett, Nigel J. Cairns, Jesse Cedarbaum, Robert C. Green, et al. 2015. "2014 Update of the Alzheimer's Disease Neuroimaging Initiative: A Review of Papers Published since Its Inception." *Alzheimer's and Dementia* 11 (6). Elsevier: e1–120.  
<http://linkinghub.elsevier.com/retrieve/pii/S1552526014028659>.
- Weiner, Michael W., Dallas P. Veitch, Paul S. Aisen, Laurel A. Beckett, Nigel J. Cairns, Robert C. Green, Danielle Harvey, et al. 2013. "The Alzheimer's Disease Neuroimaging Initiative: A Review of Papers Published since Its Inception." *Alzheimer's & Dementia: The Journal of the Alzheimer's Association* 9 (5). Elsevier: e111–94.  
<http://linkinghub.elsevier.com/retrieve/pii/S1552526013024291>.
- Weiner, 2017. "Recent Publications from the Alzheimer's Disease Neuroimaging Initiative: Reviewing Progress toward Improved AD Clinical Trials." *Alzheimer's & Dementia: The Journal of the Alzheimer's Association*. doi:10.1016/j.jalz.2016.11.007.
- Wen, Wei, Yong He, and Perminder Sachdev. 2011. "Structural Brain Networks and Neuropsychiatric Disorders." *Current Opinion in Psychiatry* 24 (3): 219–25.  
<http://content.wkhealth.com/linkback/openurl?sid=WKPTLP:landingpage&an=00001504-201105000-00009>.
- Wijk, Bernadette C. M. van, Cornelis J. Stam, and Andreas Daffertshofer. 2010. "Comparing Brain Networks of Different Size and Connectivity Density Using Graph Theory." *PloS One* 5 (10). Public Library of Science: e13701. <http://dx.plos.org/10.1371/journal.pone.0013701>.
- Zalesky, Andrew, Alex Fornito, Ian H. Harding, Luca Cocchi, Murat Yücel, Christos Pantelis, and Edward T. Bullmore. 2010. "Whole-Brain Anatomical Networks: Does the Choice of Nodes Matter?" *NeuroImage* 50 (3). Elsevier: 970–83.  
<http://linkinghub.elsevier.com/retrieve/pii/S1053811909013159>.

# Supplementary material

## Appendix A - Details of subjects used in this study.

### Subject IDs from ADNI in Table 1

Note these subjects are all from baseline.

#### AD from Table 1

|            |            |            |            |            |            |            |
|------------|------------|------------|------------|------------|------------|------------|
| 011_S_0003 | 128_S_0310 | 018_S_0633 | 126_S_0891 | 109_S_1157 | 127_S_1382 | 005_S_0814 |
| 022_S_0007 | 031_S_0321 | 021_S_0642 | 023_S_0916 | 013_S_1161 | 027_S_1385 | 002_S_0816 |
| 011_S_0010 | 035_S_0341 | 006_S_0653 | 005_S_0929 | 094_S_1164 | 094_S_1397 | 137_S_0841 |
| 067_S_0029 | 021_S_0343 | 018_S_0682 | 002_S_0955 | 133_S_1170 | 128_S_1409 | 127_S_0844 |
| 011_S_0053 | 137_S_0366 | 012_S_0689 | 114_S_0979 | 024_S_1171 | 041_S_1435 | 098_S_0884 |
| 067_S_0076 | 116_S_0370 | 012_S_0712 | 016_S_0991 | 067_S_1185 | 023_S_0078 | 002_S_0938 |
| 023_S_0083 | 114_S_0374 | 012_S_0720 | 100_S_0995 | 109_S_1192 | 098_S_0149 | 130_S_0956 |
| 023_S_0084 | 116_S_0392 | 033_S_0733 | 013_S_0996 | 013_S_1205 | 128_S_0167 | 029_S_0999 |
| 123_S_0088 | 032_S_0400 | 128_S_0740 | 036_S_1001 | 126_S_1221 | 100_S_0190 | 094_S_1027 |
| 123_S_0091 | 027_S_0404 | 100_S_0747 | 002_S_1018 | 067_S_1253 | 128_S_0216 | 027_S_1081 |
| 023_S_0093 | 136_S_0426 | 021_S_0753 | 141_S_1024 | 027_S_1254 | 022_S_0219 | 094_S_1090 |
| 123_S_0094 | 127_S_0431 | 127_S_0754 | 032_S_1037 | 003_S_1257 | 007_S_0316 | 014_S_1095 |
| 068_S_0109 | 137_S_0438 | 036_S_0759 | 137_S_1041 | 023_S_1262 | 014_S_0328 | 100_S_1113 |
| 067_S_0110 | 099_S_0470 | 036_S_0760 | 053_S_1044 | 016_S_1263 | 018_S_0335 | 029_S_1184 |
| 022_S_0129 | 116_S_0487 | 109_S_0777 | 133_S_1055 | 033_S_1281 | 014_S_0356 | 130_S_1201 |
| 023_S_0139 | 099_S_0492 | 010_S_0786 | 029_S_1056 | 033_S_1283 | 099_S_0372 | 031_S_1209 |
| 032_S_0147 | 131_S_0497 | 141_S_0790 | 003_S_1059 | 033_S_1285 | 057_S_0474 | 007_S_1248 |
| 123_S_0162 | 128_S_0517 | 062_S_0793 | 100_S_1062 | 023_S_1289 | 073_S_0565 | 007_S_1304 |
| 011_S_0183 | 128_S_0528 | 012_S_0803 | 082_S_1079 | 130_S_1290 | 037_S_0627 | 009_S_1334 |
| 136_S_0194 | 062_S_0535 | 067_S_0812 | 027_S_1082 | 051_S_1296 | 062_S_0690 | 007_S_1339 |
| 020_S_0213 | 022_S_0543 | 067_S_0828 | 032_S_1101 | 024_S_1307 | 131_S_0691 | 005_S_1341 |
| 005_S_0221 | 006_S_0547 | 010_S_0829 | 094_S_1102 | 033_S_1308 | 141_S_0696 | 057_S_1371 |
| 114_S_0228 | 031_S_0554 | 029_S_0836 | 021_S_1109 | 130_S_1337 | 013_S_0699 | 057_S_1379 |
| 128_S_0266 | 036_S_0577 | 027_S_0850 | 141_S_1137 | 009_S_1354 | 033_S_0724 | 041_S_1391 |
| 018_S_0286 | 013_S_0592 | 141_S_0852 | 099_S_1144 | 041_S_1368 | 062_S_0730 | 094_S_1402 |
| 136_S_0299 | 126_S_0606 | 141_S_0853 | 141_S_1152 | 057_S_1373 | 100_S_0743 | 128_S_1430 |
| 136_S_0300 | 002_S_0619 | 033_S_0889 | 100_S_1154 | 082_S_1377 | 126_S_0784 |            |

#### CN1 subjects used in Table 1

|            |            |            |            |            |            |            |
|------------|------------|------------|------------|------------|------------|------------|
| 011_S_0002 | 123_S_0106 | 073_S_0312 | 013_S_0502 | 127_S_0684 | 003_S_0931 | 116_S_1249 |
| 011_S_0005 | 123_S_0113 | 072_S_0315 | 126_S_0506 | 002_S_0685 | 057_S_0934 | 052_S_1250 |

|            |            |            |            |            |            |            |
|------------|------------|------------|------------|------------|------------|------------|
| 011_S_0008 | 027_S_0120 | 131_S_0319 | 033_S_0516 | 137_S_0686 | 052_S_0951 | 052_S_1251 |
| 022_S_0014 | 131_S_0123 | 037_S_0327 | 014_S_0519 | 094_S_0692 | 023_S_0963 | 082_S_1256 |
| 100_S_0015 | 041_S_0125 | 021_S_0337 | 128_S_0522 | 141_S_0717 | 109_S_0967 | 002_S_1261 |
| 011_S_0016 | 068_S_0127 | 099_S_0352 | 133_S_0525 | 141_S_0726 | 130_S_0969 | 094_S_1267 |
| 067_S_0019 | 035_S_0156 | 016_S_0359 | 094_S_0526 | 006_S_0731 | 137_S_0972 | 013_S_1276 |
| 011_S_0021 | 021_S_0159 | 116_S_0360 | 099_S_0534 | 033_S_0734 | 041_S_1002 | 002_S_1280 |
| 011_S_0022 | 114_S_0166 | 082_S_0363 | 016_S_0538 | 033_S_0741 | 012_S_1009 | 100_S_1286 |
| 011_S_0023 | 098_S_0171 | 018_S_0369 | 128_S_0545 | 009_S_0751 | 109_S_1013 | 020_S_1288 |
| 023_S_0031 | 098_S_0172 | 116_S_0382 | 014_S_0548 | 082_S_0761 | 109_S_1014 | 131_S_1301 |
| 100_S_0035 | 114_S_0173 | 073_S_0386 | 035_S_0555 | 141_S_0767 | 033_S_1016 | 035_S_0048 |
| 099_S_0040 | 067_S_0177 | 027_S_0403 | 014_S_0558 | 062_S_0768 | 036_S_1023 | 022_S_0066 |
| 018_S_0043 | 136_S_0184 | 126_S_0405 | 002_S_0559 | 057_S_0779 | 024_S_1063 | 022_S_0130 |
| 100_S_0047 | 136_S_0186 | 002_S_0413 | 013_S_0575 | 141_S_0810 | 033_S_1086 | 136_S_0196 |
| 067_S_0056 | 068_S_0210 | 114_S_0416 | 036_S_0576 | 036_S_0813 | 141_S_1094 | 073_S_0311 |
| 023_S_0058 | 005_S_0223 | 010_S_0419 | 062_S_0578 | 057_S_0818 | 033_S_1098 | 131_S_0441 |
| 067_S_0059 | 128_S_0229 | 010_S_0420 | 114_S_0601 | 009_S_0842 | 051_S_1123 | 014_S_0520 |
| 023_S_0061 | 128_S_0230 | 018_S_0425 | 005_S_0602 | 029_S_0843 | 012_S_1133 | 005_S_0553 |
| 010_S_0067 | 130_S_0232 | 133_S_0433 | 126_S_0605 | 029_S_0845 | 032_S_1169 | 116_S_0648 |
| 007_S_0068 | 128_S_0245 | 131_S_0436 | 005_S_0610 | 009_S_0862 | 023_S_1190 | 094_S_0711 |
| 100_S_0069 | 067_S_0257 | 037_S_0454 | 031_S_0618 | 128_S_0863 | 068_S_1191 | 129_S_0778 |
| 007_S_0070 | 127_S_0259 | 137_S_0459 | 127_S_0622 | 029_S_0866 | 941_S_1194 | 029_S_0824 |
| 123_S_0072 | 127_S_0260 | 037_S_0467 | 012_S_0637 | 109_S_0876 | 941_S_1195 | 003_S_0907 |
| 027_S_0074 | 041_S_0262 | 010_S_0472 | 082_S_0640 | 020_S_0883 | 941_S_1197 | 003_S_0981 |
| 023_S_0081 | 128_S_0272 | 032_S_0479 | 057_S_0643 | 130_S_0886 | 941_S_1202 | 021_S_0984 |
| 136_S_0086 | 137_S_0283 | 006_S_0484 | 021_S_0647 | 098_S_0896 | 941_S_1203 | 024_S_0985 |
| 073_S_0089 | 002_S_0295 | 133_S_0488 | 116_S_0657 | 041_S_0898 | 007_S_1206 | 003_S_1021 |
| 099_S_0090 | 123_S_0298 | 094_S_0489 | 036_S_0672 | 020_S_0899 | 007_S_1222 | 062_S_1099 |
| 032_S_0095 | 137_S_0301 | 133_S_0493 | 032_S_0677 | 033_S_0920 | 116_S_1232 | 130_S_1200 |
| 022_S_0096 | 037_S_0303 | 006_S_0498 | 126_S_0680 | 033_S_0923 | 094_S_1241 | 012_S_1212 |
| 020_S_0097 | 082_S_0304 | 128_S_0500 | 006_S_0681 | 023_S_0926 | 128_S_1242 | 023_S_1306 |

### MCIC subjects used in Table 1

|            |            |            |            |            |            |            |
|------------|------------|------------|------------|------------|------------|------------|
| 002_S_0954 | 023_S_0042 | 035_S_0204 | 127_S_0394 | 011_S_0861 | 041_S_0549 | 126_S_1077 |
|------------|------------|------------|------------|------------|------------|------------|

|            |            |            |            |            |            |            |
|------------|------------|------------|------------|------------|------------|------------|
| 002_S_1070 | 023_S_0388 | 035_S_0997 | 133_S_0638 | 011_S_1282 | 041_S_1412 | 127_S_1427 |
| 005_S_0222 | 023_S_0604 | 051_S_1331 | 136_S_0195 | 013_S_0325 | 041_S_1423 | 128_S_0947 |
| 007_S_0041 | 023_S_0855 | 052_S_0952 | 141_S_0982 | 014_S_0658 | 057_S_0941 | 130_S_0423 |
| 007_S_0128 | 023_S_0887 | 052_S_1054 | 941_S_1311 | 023_S_0030 | 057_S_1217 | 133_S_0727 |
| 007_S_0344 | 023_S_1247 | 053_S_0507 | 941_S_1363 | 023_S_0625 | 067_S_0045 | 133_S_0913 |
| 011_S_0856 | 027_S_0461 | 062_S_1299 | 002_S_0729 | 027_S_0179 | 067_S_0077 | 136_S_0695 |
| 013_S_0240 | 033_S_0723 | 067_S_0243 | 005_S_0572 | 027_S_0256 | 094_S_0434 | 141_S_0915 |
| 013_S_0860 | 033_S_0725 | 067_S_0336 | 006_S_1130 | 027_S_1213 | 098_S_0269 | 141_S_1244 |
| 022_S_0750 | 033_S_0906 | 094_S_1015 | 007_S_0249 | 027_S_1387 | 099_S_0054 | 941_S_1295 |
| 022_S_1394 | 033_S_0922 | 094_S_1398 | 011_S_0241 | 033_S_0567 | 099_S_0111 |            |

### CN2 subjects used in Table 1

|            |            |            |            |            |            |            |
|------------|------------|------------|------------|------------|------------|------------|
| 011_S_0002 | 020_S_0097 | 073_S_0386 | 002_S_0559 | 062_S_0768 | 041_S_1002 | 013_S_1276 |
| 011_S_0005 | 027_S_0120 | 027_S_0403 | 013_S_0575 | 057_S_0779 | 109_S_1013 | 002_S_1280 |
| 011_S_0008 | 131_S_0123 | 126_S_0405 | 036_S_0576 | 141_S_0810 | 109_S_1014 | 020_S_1288 |
| 022_S_0014 | 041_S_0125 | 002_S_0413 | 062_S_0578 | 036_S_0813 | 033_S_1016 | 131_S_1301 |
| 011_S_0016 | 035_S_0156 | 114_S_0416 | 114_S_0601 | 029_S_0843 | 036_S_1023 | 035_S_0048 |
| 067_S_0019 | 114_S_0166 | 133_S_0433 | 005_S_0602 | 029_S_0845 | 024_S_1063 | 022_S_0066 |
| 011_S_0021 | 098_S_0171 | 131_S_0436 | 126_S_0605 | 128_S_0863 | 033_S_1086 | 022_S_0130 |
| 011_S_0022 | 098_S_0172 | 006_S_0484 | 005_S_0610 | 029_S_0866 | 141_S_1094 | 136_S_0196 |
| 011_S_0023 | 114_S_0173 | 133_S_0488 | 127_S_0622 | 109_S_0876 | 033_S_1098 | 073_S_0311 |
| 023_S_0031 | 067_S_0177 | 094_S_0489 | 082_S_0640 | 020_S_0883 | 051_S_1123 | 131_S_0441 |
| 099_S_0040 | 136_S_0184 | 133_S_0493 | 057_S_0643 | 130_S_0886 | 023_S_1190 | 014_S_0520 |
| 067_S_0056 | 136_S_0186 | 006_S_0498 | 036_S_0672 | 098_S_0896 | 941_S_1194 | 005_S_0553 |
| 023_S_0058 | 130_S_0232 | 013_S_0502 | 126_S_0680 | 041_S_0898 | 941_S_1195 | 094_S_0711 |
| 067_S_0059 | 067_S_0257 | 126_S_0506 | 006_S_0681 | 020_S_0899 | 941_S_1197 | 029_S_0824 |
| 023_S_0061 | 127_S_0259 | 033_S_0516 | 127_S_0684 | 033_S_0920 | 941_S_1202 | 003_S_0907 |
| 007_S_0068 | 127_S_0260 | 014_S_0519 | 002_S_0685 | 033_S_0923 | 941_S_1203 | 003_S_0981 |
| 007_S_0070 | 002_S_0295 | 133_S_0525 | 094_S_0692 | 023_S_0926 | 007_S_1206 | 024_S_0985 |
| 027_S_0074 | 082_S_0304 | 094_S_0526 | 141_S_0717 | 003_S_0931 | 007_S_1222 | 003_S_1021 |
| 023_S_0081 | 073_S_0312 | 099_S_0534 | 006_S_0731 | 057_S_0934 | 052_S_1250 | 062_S_1099 |
| 136_S_0086 | 131_S_0319 | 016_S_0538 | 033_S_0734 | 052_S_0951 | 052_S_1251 | 130_S_1200 |
| 073_S_0089 | 099_S_0352 | 014_S_0548 | 033_S_0741 | 023_S_0963 | 082_S_1256 | 023_S_1306 |

|            |            |            |            |            |            |  |
|------------|------------|------------|------------|------------|------------|--|
| 099_S_0090 | 016_S_0359 | 035_S_0555 | 082_S_0761 | 109_S_0967 | 002_S_1261 |  |
| 022_S_0096 | 082_S_0363 | 014_S_0558 | 141_S_0767 | 130_S_0969 | 094_S_1267 |  |

### Subject IDs excluded from the ADNI cohort

owing to failure in Freesurfer processing or other errors

|            |            |            |            |
|------------|------------|------------|------------|
| 006_S_0322 | 018_S_0277 | 062_S_1091 | 109_S_0840 |
| 006_S_0521 | 027_S_0948 | 067_S_0020 | 128_S_0701 |
| 010_S_0662 | 027_S_1335 | 067_S_0024 | 128_S_0805 |
| 010_S_0788 | 031_S_0773 | 073_S_1207 | 128_S_1181 |
| 011_S_0326 | 033_S_0888 | 094_S_0964 | 130_S_0460 |
| 014_S_0357 | 033_S_1087 | 100_S_0893 | 141_S_0340 |

### Subjects IDs used from ABIDE in this study

#### CN3 subjects used in Table 2

|              |                  |                  |                  |                 |
|--------------|------------------|------------------|------------------|-----------------|
| Pitt_0050038 | Pitt_0050047     | UM_2_0050428     | UCLA_1_0051281   | KKI_0050776     |
| Pitt_0050039 | Pitt_0050046     | UM_2_0050426     | Caltech_0051484  | UM_1_0050334    |
| NYU_0051036  | Trinity_0051142  | UM_2_0050424     | SBL_0051562      | UM_1_0050335    |
| Pitt_0050034 | Leuven_1_0050703 | Leuven_2_0050730 | NYU_0051090      | Yale_0050577    |
| Pitt_0050035 | Leuven_1_0050701 | Leuven_2_0050731 | Leuven_1_0050699 | SBL_0051566     |
| Pitt_0050036 | NYU_0051105      | Leuven_2_0050732 | NYU_0051039      | NYU_0051041     |
| Pitt_0050037 | NYU_0051104      | Leuven_2_0050733 | UM_2_0050417     | Yale_0050558    |
| Pitt_0050030 | NYU_0051107      | Leuven_2_0050735 | Olin_0050122     | UM_1_0050366    |
| Pitt_0050031 | NYU_0051106      | Leuven_2_0050736 | Yale_0050553     | Trinity_0051137 |
| Pitt_0050032 | NYU_0051101      | Leuven_2_0050737 | Olin_0050109     | Pitt_0050050    |
| Pitt_0050033 | NYU_0051100      | Leuven_2_0050738 | SBL_0051561      | UCLA_2_0051309  |
| Pitt_0050049 | NYU_0051103      | Leuven_2_0050739 | Trinity_0051141  | UCLA_2_0051306  |
| Pitt_0050048 | NYU_0051102      | MaxMun_a_0051370 | UM_2_0050414     | UCLA_1_0051272  |
| NYU_0051038  | NYU_0051109      | Leuven_2_0050741 | Leuven_2_0050722 | NYU_0051079     |
| Pitt_0050041 | KKI_0050782      | Leuven_2_0050740 | UM_2_0050422     | USM_0050436     |
| Pitt_0050040 | USM_0050463      | Leuven_2_0050742 | UM_2_0050421     | USM_0050433     |
| Pitt_0050043 | USM_0050466      | Trinity_0050257  | UM_2_0050427     | Olin_0050119    |
| Pitt_0050042 | USM_0050467      | KKI_0050820      | UM_2_0050425     | Trinity_0050266 |

|              |             |             |             |              |
|--------------|-------------|-------------|-------------|--------------|
| Pitt_0050045 | USM_0050468 | SBL_0051567 | NYU_0051129 | SDSU_0050196 |
| Pitt_0050044 | USM_0050469 | SBL_0051564 | NYU_0051084 | Olin_0050113 |

## AUT subjects used in Table 2

|                  |                  |                  |                  |                  |
|------------------|------------------|------------------|------------------|------------------|
| NYU_0051032      | UM_1_0050296     | UCLA_1_0051224   | MaxMun_d_0051350 | UM_1_0050326     |
| NYU_0051034      | Pitt_0050028     | UCLA_1_0051225   | NYU_0050985      | NYU_0050984      |
| UCLA_1_0051240   | Pitt_0050027     | UCLA_1_0051226   | USM_0050523      | Leuven_2_0050753 |
| Leuven_1_0050702 | NYU_0051028      | USM_0050488      | NYU_0050994      | Leuven_2_0050751 |
| USM_0050509      | Leuven_1_0050694 | USM_0050487      | NYU_0050997      | Leuven_2_0050757 |
| USM_0050505      | CMU_a_0050654    | Leuven_2_0050748 | NYU_0051008      | Leuven_2_0050754 |
| USM_0050501      | Leuven_1_0050711 | KKI_0050801      | NYU_0051009      | NYU_0050954      |
| USM_0050500      | USM_0050518      | KKI_0050802      | NYU_0051006      | NYU_0050956      |
| UM_1_0050315     | UM_1_0050278     | KKI_0050804      | NYU_0051007      | UCLA_2_0051302   |
| Leuven_2_0050746 | UM_1_0050308     | Pitt_0050011     | NYU_0051001      | CMU_b_0050652    |
| Trinity_0050251  | UM_2_0050410     | Pitt_0050016     | UCLA_1_0051237   | Pitt_0050007     |
| Trinity_0050250  | USM_0050531      | Pitt_0050015     | UCLA_1_0051235   | Pitt_0050003     |
| UCLA_1_0051219   | Trinity_0050249  | UCLA_1_0051231   | UCLA_1_0051234   | USM_0050532      |
| UCLA_1_0051218   | Trinity_0050242  | USM_0050520      | Pitt_0050057     | UCLA_1_0051209   |
| UCLA_1_0051215   | Trinity_0050245  | USM_0050525      | Pitt_0050055     | UCLA_1_0051206   |
| UCLA_1_0051214   | Trinity_0050246  | NYU_0050987      | Pitt_0050053     | UCLA_1_0051205   |
| USM_0050491      | SBL_0051585      | NYU_0050986      | NYU_0050998      | UCLA_1_0051201   |
| USM_0050493      | NYU_0051012      | UM_2_0050402     | Caltech_0051468  | NYU_0050989      |
| USM_0050492      | UCLA_2_0051317   | UM_2_0050406     | UM_1_0050321     | UM_1_0050285     |
| UM_1_0050298     | UCLA_1_0051223   | UCLA_2_0051293   | UM_1_0050320     | Leuven_1_0050689 |

## Appendix B

### The need for a trimmed estimator

In the Methods section, when describing the computation behind HiWeNet, we note that we remove 5% outliers from both tails of the thickness value distribution. The need to trim the distribution arises from the presence of several outlying values as can be seen from Fig. B1. There are large number of vertices with zero and very small values, making it necessary to trim the patch-wise distributions to stabilize the distance estimates between a random pair of patch-wise histograms. We observe similar trends across all patch sizes (all values of  $m$ ).

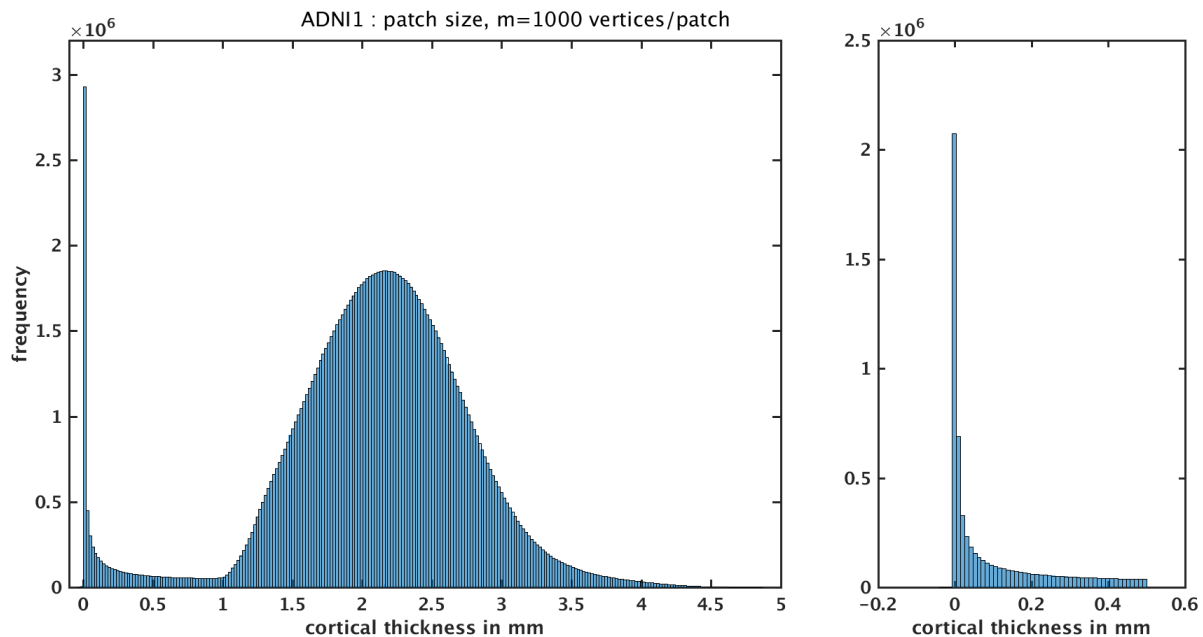

Figure B1: the full distribution of thickness values from ADNI1 dataset using all the subjects (CN, MCI and AD) included in this study. It is clear there are large number of vertices with zero and very small values, making it necessary to trim the patch-wise distributions to stabilize the distance estimates between a random pair of patch-wise histograms.
